# Supplementary material for: Endogenization and excision of human herpesvirus 6 in human genomes
Source: PLoS Genet. 2020 Aug 10;16(8):e1008915. doi: 10.1371/journal.pgen.1008915 (PMC7444522; doi:10.1371/journal.pgen.1008915)
Supplement: S4 Table — (XLSX) [file pgen.1008915.s011.xlsx]

## Sheet: Sheet1
Table S4: Genome-wide significant variants from GWAS of clonal integrated HHV-6B
Chromosome	Position	A1/A2	AF Case	AF Control	P	OR
22	51184036	G/C	0.4545	0.001615	5.683e-22	515.2
22	51189754	C/T	0.4545	0.001682	7.951e-22	494.6
22	51208691	G/C	0.5455	0.03216	6.802e-13	36.11
22	51155446	T/A	0.5909	0.05073	5.287e-12	27.03
22	51161093	T/C	0.5909	0.05087	5.464e-12	26.95
22	51158301	C/T	0.5909	0.05094	5.555e-12	26.91
22	51195127	C/T	0.5455	0.05585	3.803e-10	20.29
22	51092137	T/G	0.5455	0.05935	7.579e-10	19.02
22	51099104	C/T	0.5455	0.06507	2.146e-09	17.24
22	50887774	A/G	0.1818	0.0006056	2.537e-09	366.7
22	51060264	A/T	0.4091	0.02718	3.23e-09	24.78
22	50786552	C/T	0.1818	0.0006729	3.548e-09	330
2	7065195	C/T	0.1364	0.0001346	2.797e-08	1173
